# Supplementary material
Source: publisher figshare collection journal article supplement (https://diabetesjournals.figshare.com/articles/dataset/_/21667085)
Supplement: Supplementary file 1 [file 1]

**Appendix 1 - List of participating centers.**

Barbara Davis Center for Childhood Diabetes

Baylor College of Medicine

Benaroya Research Institute

Columbia University

Indiana University - Riley Hospital for Children

Skane University Hospital, Sweden

Stanford University

The Children's Mercy Hospital

The Hospital for Sick Children, Canada

USF Diabetes Center

University of Bristol, UK

University of California - San Francisco

University of Florida

University of Minnesota

University of Pittsburgh

University of Texas Southwestern

Vanderbilt Eskind Diabetes Clinic

Walter and Eliza Hall Institute of Medical Research, Australia

Yale University School of Medicine
