# Supplementary material
Source: publisher figshare collection journal article supplement (https://diabetesjournals.figshare.com/articles/dataset/_/21667085)
Supplement: Supplementary file 2 [file 1]

## Supplementary Material

|                              | <b>AAb +</b> | <b>Non-<br/>progressors</b> | <b>Progressors</b> |                |
|------------------------------|--------------|-----------------------------|--------------------|----------------|
| <b>Autoantibody</b><br>n (%) | <b>n=95</b>  | <b>n=66</b>                 | <b>n=29</b>        | <b>P-Value</b> |
| <b>GAD65 Aab</b>             | 91 (95.8)    | 64 (97)                     | 27 (93.1)          | 0.6            |
| <b>ICA512 Aab</b>            | 59 (62.1)    | 38 (57.6)                   | 21 (72.4)          | 0.3            |
| <b>MIAA</b>                  | 32 (33.7)    | 21 (31.8)                   | 11 (37.9)          | 0.6            |
| <b>ZnT8 Aab</b>              | 53 (55.8)    | 31 (47)                     | 22 (75.9)          | <b>0.01</b>    |
| <b>ICA</b>                   | 61 (64.2)    | 39 (59)                     | 22 (75.9)          | 0.2            |
| <b>5 Aab</b>                 | 9 (9.5)      | 5 (7.6)                     | 4 (13.8)           | 0.4            |
| <b>4 Aab</b>                 | 29 (30.5)    | 16 (24.2)                   | 13 (44.8)          | <b>0.06</b>    |
| <b>3 Aab</b>                 | 21 (22.1)    | 14 (21.1)                   | 7 (24.1)           | 0.8            |
| <b>2 Aab</b>                 | 36 (37.9)    | 31 (47)                     | 5 (17.2)           | <b>0.006</b>   |

**Supplementary Table 1.** Autoantibody distribution (at time of eligibility).

|                                    | Stage 1 participants<br>who progressed to<br>type 1 diabetes | Stage 2 participants<br>who progressed to<br>type 1 diabetes | P-value     |
|------------------------------------|--------------------------------------------------------------|--------------------------------------------------------------|-------------|
|                                    | n=11                                                         | n=18                                                         |             |
| <b>Demographics</b>                |                                                              |                                                              |             |
| Age, years [Median (IQR)]          | 11.7 (4.5–24.8)                                              | 12.2 (9.8– 16.9)                                             | 0.58        |
| Gender [Male, n (%)]               | 8 (72.7)                                                     | 10 (55.6)                                                    | 0.45        |
| Race [White, n (%)]                | 11/11 (100)                                                  | 16/17 (94.1)                                                 | 1.0         |
| BMI                                | 21.0 ± 5.3                                                   | 20.3 ± 5.8                                                   | 0.74        |
| Time to Dx, months [Median (IQR)]  | 19.5 (12.4–31.7)                                             | 16.8 (4.2–29)                                                | 0.29        |
| HbA1c, %                           | 5.1 ± 0.5                                                    | 5.4 ± 0.4                                                    | <b>0.06</b> |
| <b>CGM metrics</b>                 |                                                              |                                                              |             |
| Mean glucose, mg/dL                | 100.8 ± 7.9                                                  | 104.6 ± 12.6                                                 | 0.38        |
| SD, mg/dL                          | 19.9 ± 3.2                                                   | 23.3 ± 6.1                                                   | 0.09        |
| CV, mg/dL                          | 19.9 ± 4.0                                                   | 22.1 ± 4.3                                                   | 0.19        |
| Maximum CGM glucose, mg/dL         | 175.2 ± 16.5                                                 | 193.9 ± 41.1                                                 | 0.16        |
| Minimum CGM glucose, mg/dL         | 51.2 ± 17.5                                                  | 54.7 ± 12.2                                                  | 0.53        |
| Mean Glucose Range, mg/dL          | 124.0 ± 25.9                                                 | 139.2 ± 38.1                                                 | 0.25        |
| % Time CGM ≥ 120 mg/dL             | 17.8 ± 8.8                                                   | 24.0 ± 16.5                                                  | 0.26        |
| % Time CGM ≥ 140 mg/dL             | 4.0 ± 2.5                                                    | 10.4 ± 9.2                                                   | <b>0.03</b> |
| % Time CGM ≥ 160 mg/dL             | 0.8 ± 0.7                                                    | 4.2 ± 4.0                                                    | <b>0.01</b> |
| CONGA                              | 19.4 ± 3.0                                                   | 22.3 ± 5.3                                                   | 0.11        |
| DySF                               | 2.9 ± 1.8                                                    | 4.6 ± 3.4                                                    | 0.15        |
| MAGE                               | 40.9 ± 7.2                                                   | 45.1 ± 11.4                                                  | 0.28        |
| MODD                               | 19.3 ± 3.3                                                   | 23.2 ± 5.8                                                   | <b>0.05</b> |
| <b>Daytime CGM metrics</b>         |                                                              |                                                              |             |
| Mean †day glucose, mg/dL           | 101.1 ± 7.5                                                  | 105.7 ± 12.3                                                 | 0.27        |
| Maximum †day glucose value, mg/dL  | 173.5 ± 16.2                                                 | 193.9 ± 41.1                                                 | 0.13        |
| <b>Overnight CGM metrics</b>       |                                                              |                                                              |             |
| Mean night glucose, mg/dL          | 99.9 ± 14.5                                                  | 101.2 ± 15.6                                                 | 0.83        |
| Maximum night glucose value, mg/dL | 148.9 ± 23.5                                                 | 153.5 ± 32.5                                                 | 0.69        |

Unless otherwise noted, values are the mean ± SD (continuous variables). †Values between 6 am and midnight. Abbreviations: IQR, interquartile range; BMI, body mass index; Dx, diagnosis.

**Supplementary Table 2. Demographic data and CGM Measures of Interstitial Glucose Control and Variability.** Stage 1 participants who progressed to type 1 diabetes vs. Stage 2 participants who progressed to type 1 diabetes.

| <b>% &gt; 140</b> | <b>Sensitivity</b> | <b>95% CI</b>       | <b>Specificity</b> | <b>95% CI</b>      | <b>Likelihood ratio</b> |
|-------------------|--------------------|---------------------|--------------------|--------------------|-------------------------|
| > 0.1000          | 0.9310             | 0.7723 to 0.9915    | 0.1000             | 0.002529 to 0.4450 | 1.034                   |
| > 0.3000          | 0.9310             | 0.7723 to 0.9915    | 0.2000             | 0.02521 to 0.5561  | 1.164                   |
| > 0.5000          | 0.8966             | 0.7265 to 0.9781    | 0.4000             | 0.1216 to 0.7376   | 1.494                   |
| > 0.6500          | 0.8621             | 0.6834 to 0.9611    | 0.4000             | 0.1216 to 0.7376   | 1.437                   |
| > 0.7500          | 0.8621             | 0.6834 to 0.9611    | 0.5000             | 0.1871 to 0.8129   | 1.724                   |
| > 0.8500          | 0.8621             | 0.6834 to 0.9611    | 0.7000             | 0.3475 to 0.9333   | 2.874                   |
| > 1.050           | 0.8276             | 0.6423 to 0.9415    | 0.7000             | 0.3475 to 0.9333   | 2.759                   |
| > 1.600           | 0.7931             | 0.6028 to 0.9201    | 0.7000             | 0.3475 to 0.9333   | 2.644                   |
| > 2.250           | 0.7586             | 0.5646 to 0.8970    | 0.7000             | 0.3475 to 0.9333   | 2.529                   |
| > 2.550           | 0.7241             | 0.5276 to 0.8727    | 0.7000             | 0.3475 to 0.9333   | 2.414                   |
| > 3.000           | 0.6552             | 0.4567 to 0.8206    | 0.7000             | 0.3475 to 0.9333   | 2.184                   |
| > 3.700           | 0.6207             | 0.4226 to 0.7931    | 0.7000             | 0.3475 to 0.9333   | 2.069                   |
| > 4.050           | 0.5862             | 0.3894 to 0.7648    | 0.7000             | 0.3475 to 0.9333   | 1.954                   |
| > 4.150           | 0.5517             | 0.3569 to 0.7355    | 0.7000             | 0.3475 to 0.9333   | 1.839                   |
| > 4.400           | 0.5517             | 0.3569 to 0.7355    | 0.8000             | 0.4439 to 0.9748   | 2.759                   |
| > 4.700           | 0.5172             | 0.3253 to 0.7055    | 0.8000             | 0.4439 to 0.9748   | 2.586                   |
| > 5.000           | 0.4828             | 0.2945 to 0.6747    | 0.8000             | 0.4439 to 0.9748   | 2.414                   |
| > 5.450           | 0.4483             | 0.2645 to 0.6431    | 0.8000             | 0.4439 to 0.9748   | 2.241                   |
| > 6.200           | 0.4138             | 0.2352 to 0.6106    | 0.8000             | 0.4439 to 0.9748   | 2.069                   |
| > 6.900           | 0.3793             | 0.2069 to 0.5774    | 0.8000             | 0.4439 to 0.9748   | 1.897                   |
| > 8.050           | 0.3793             | 0.2069 to 0.5774    | 0.9000             | 0.5550 to 0.9975   | 3.793                   |
| > 9.050           | 0.3448             | 0.1794 to 0.5433    | 0.9000             | 0.5550 to 0.9975   | 3.448                   |
| > 9.550           | 0.3448             | 0.1794 to 0.5433    | 1.000              | 0.6915 to 1.000    |                         |
| > 10.45           | 0.3103             | 0.1528 to 0.5083    | 1.000              | 0.6915 to 1.000    |                         |
| > 11.20           | 0.2759             | 0.1273 to 0.4724    | 1.000              | 0.6915 to 1.000    |                         |
| > 11.85           | 0.2414             | 0.1030 to 0.4354    | 1.000              | 0.6915 to 1.000    |                         |
| > 13.95           | 0.2069             | 0.07994 to 0.3972   | 1.000              | 0.6915 to 1.000    |                         |
| > 15.80           | 0.1724             | 0.05846 to 0.3577   | 1.000              | 0.6915 to 1.000    |                         |
| > 16.65           | 0.1379             | 0.03889 to 0.3166   | 1.000              | 0.6915 to 1.000    |                         |
| > 19.60           | 0.1034             | 0.02186 to 0.2735   | 1.000              | 0.6915 to 1.000    |                         |
| > 23.45           | 0.06897            | 0.008464 to 0.2277  | 1.000              | 0.6915 to 1.000    |                         |
| > 27.85           | 0.03448            | 0.0008726 to 0.1776 | 1.000              | 0.6915 to 1.000    |                         |

**Supplementary Table 3. ROC analysis for %> 140 mg/dL.** Cut-off values with their corresponding sensitivity and specificity of the test.

| <b>% &gt; 160</b> | <b>Sensitivity</b> | <b>95% CI</b>       | <b>Specificity</b> | <b>95% CI</b>    | <b>Likelihood ratio</b> |
|-------------------|--------------------|---------------------|--------------------|------------------|-------------------------|
| > 0.0500          | 0.7931             | 0.6028 to 0.9201    | 0.6000             | 0.2624 to 0.8784 | 1.983                   |
| > 0.2000          | 0.7241             | 0.5276 to 0.8727    | 0.6000             | 0.2624 to 0.8784 | 1.810                   |
| > 0.4000          | 0.7241             | 0.5276 to 0.8727    | 0.8000             | 0.4439 to 0.9748 | 3.621                   |
| > 0.5500          | 0.6552             | 0.4567 to 0.8206    | 0.8000             | 0.4439 to 0.9748 | 3.276                   |
| > 0.7000          | 0.6207             | 0.4226 to 0.7931    | 0.8000             | 0.4439 to 0.9748 | 3.103                   |
| > 0.9000          | 0.5517             | 0.3569 to 0.7355    | 0.8000             | 0.4439 to 0.9748 | 2.759                   |
| > 1.150           | 0.4828             | 0.2945 to 0.6747    | 0.8000             | 0.4439 to 0.9748 | 2.414                   |
| > 1.600           | 0.4138             | 0.2352 to 0.6106    | 0.8000             | 0.4439 to 0.9748 | 2.069                   |
| > 2.050           | 0.3793             | 0.2069 to 0.5774    | 0.8000             | 0.4439 to 0.9748 | 1.897                   |
| > 2.250           | 0.3793             | 0.2069 to 0.5774    | 0.9000             | 0.5550 to 0.9975 | 3.793                   |
| > 2.950           | 0.3448             | 0.1794 to 0.5433    | 0.9000             | 0.5550 to 0.9975 | 3.448                   |
| > 3.850           | 0.3103             | 0.1528 to 0.5083    | 1.000              | 0.6915 to 1.000  |                         |
| > 4.800           | 0.2759             | 0.1273 to 0.4724    | 1.000              | 0.6915 to 1.000  |                         |
| > 5.700           | 0.2414             | 0.1030 to 0.4354    | 1.000              | 0.6915 to 1.000  |                         |
| > 6.000           | 0.2069             | 0.07994 to 0.3972   | 1.000              | 0.6915 to 1.000  |                         |
| > 6.250           | 0.1724             | 0.05846 to 0.3577   | 1.000              | 0.6915 to 1.000  |                         |
| > 7.000           | 0.1379             | 0.03889 to 0.3166   | 1.000              | 0.6915 to 1.000  |                         |
| > 8.400           | 0.1034             | 0.02186 to 0.2735   | 1.000              | 0.6915 to 1.000  |                         |
| > 10.30           | 0.06897            | 0.008464 to 0.2277  | 1.000              | 0.6915 to 1.000  |                         |
| > 11.65           | 0.03448            | 0.0008726 to 0.1776 | 1.000              | 0.6915 to 1.000  |                         |

**Supplementary Table 4. ROC analysis for % >160 mg/dL.** Cut-off values with their corresponding sensitivity and specificity of the test.

| <b><u>Logistic regression model with % Time CGM <math>\geq</math> 140 mg/dL</u></b> |                    |                     |
|-------------------------------------------------------------------------------------|--------------------|---------------------|
|                                                                                     | <b>Coefficient</b> | <b>p-value</b>      |
| <b>Intercept</b>                                                                    | -2.989             | <b><i>0.014</i></b> |
| <b>Gender</b>                                                                       | 1.353              | <b><i>0.014</i></b> |
| <b>Number of Autoantibody positive</b>                                              | 0.632              | <b><i>0.009</i></b> |
| <b>FDR</b>                                                                          | -0.306             | 0.743               |
| <b>% Time CGM <math>\geq</math> 140 mg/dL</b>                                       | 0.083              | <b><i>0.036</i></b> |
| <b>Age at sampling</b>                                                              | -0.0001            | <b><i>0.047</i></b> |
| <b><u>Logistic regression model with % Time CGM <math>\geq</math> 160 mg/dL</u></b> |                    |                     |
|                                                                                     | <b>Coefficient</b> | <b>p-value</b>      |
| <b>Intercept</b>                                                                    | -2.681             | <b><i>0.022</i></b> |
| <b>Gender</b>                                                                       | 1.173              | <b><i>0.026</i></b> |
| <b>Number of Autoantibody positive</b>                                              | 0.675              | <b><i>0.004</i></b> |
| <b>FDR</b>                                                                          | -0.485             | 0.589               |
| <b>% Time CGM <math>\geq</math> 160 mg/dL</b>                                       | 0.011              | 0.153               |
| <b>Age at sampling</b>                                                              | -0.0001            | 0.077               |

FDR, First-degree Relatives.

**Supplementary Table 5.** Logistic regression models.

| Percentage of time  | Cutoff | PPV  | NPV | Sensitivity | Specificity |
|---------------------|--------|------|-----|-------------|-------------|
| At $\geq$ 140 mg/mL | 5%     | 88%  | 35% | 48%         | 80%         |
| At $\geq$ 140 mg/mL | 8%     | 92%  | 33% | 38%         | 90%         |
| At $\geq$ 160 mg/mL | 5%     | 100% | 32% | 28%         | 100%        |
| At $\geq$ 160 mg/mL | 8%     | 100% | 29% | 14%         | 100%        |

Abbreviations: PPV, positive predictive value; NPV, negative predictive value.

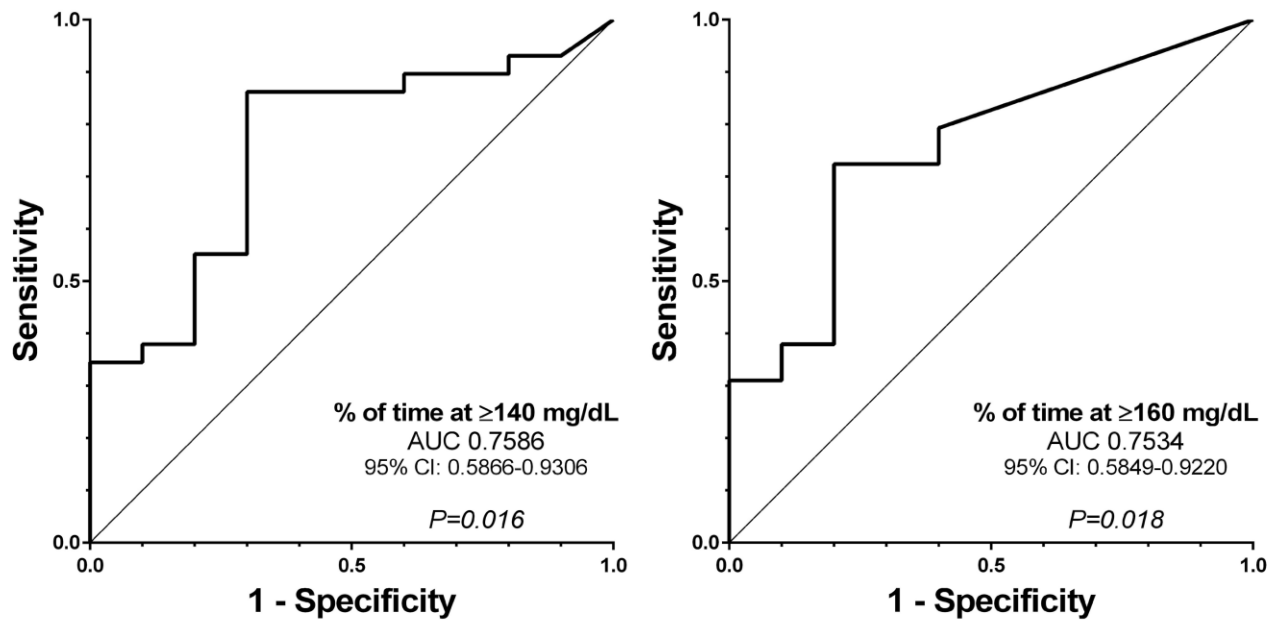

**Supplementary Figure 1.** Sensitivity and specificity for type 1 diabetes prediction were calculated for different baseline CGM cut-off points. ROC curves for percentage of time of spent at  $\geq 140$  mg/dL (left) and  $\geq 160$  mg/dL (right) supported the use of 5% and 8% as cut-off points without a significant loss of specificity (80-100%).
